# Supplementary material for: Metabolism, Mitochondrial Dysfunction, and Redox Homeostasis in Pulmonary Hypertension
Source: MDPI journal article supplement (doi:10.3390/antiox11020428), 2022-02-21
Supplement: s1 [file s1]

**Table S1.** Summary of key enzymes of different mitochondrial processes that have been associated with animal models of PH and/or human PAH.

| Process                  | Protein/Enzyme              | Cell/tissue type  | Organism | Model/disease studied | Findings                                                                                                                                        | References |
|--------------------------|-----------------------------|-------------------|----------|-----------------------|-------------------------------------------------------------------------------------------------------------------------------------------------|------------|
| Glycolytic switch        | $\alpha$ -enolase (ENO1)    | N/A               | Mouse    | Chronic hypoxia       | -Overexpression of ENO1 associated with apoptosis resistance in PASMC through the AMPK-Akt pathway.                                             | [16]       |
|                          |                             | N/A               | Rat      | Sugen-hypoxia         | Pharmacologic inhibition decreased glycolytic switch                                                                                            |            |
|                          | G6PD                        | PASMCs            | Human    | PAH                   | -Increased G6PD activity associated with upregulation of HIF $\alpha$                                                                           | [18]       |
|                          |                             | Cd133+ progenitor | Human    | Chronic hypoxia       |                                                                                                                                                 | [19]       |
|                          |                             | N/A               | Mouse    | Sugen-hypoxia         | -Pharmacological inhibition led to decreased in RV pressure                                                                                     | [19]       |
|                          |                             | N/A               | Mouse    | PAH                   | -G6PD-deficient mice had PA and RV remodeling as well as PH. Thought to be related to hemolysis, oxidative stress, and metabolic reprogramming. | [20]       |
|                          |                             | N/A               | Human    | PAH                   | -Select patients with PAH have varying decreased of G6PD deficiency                                                                             | [21]       |
| Mitochondrial biogenesis | Hexokinase                  | RV myocytes       | Rat      | Monocrotaline         | -Upregulated, via mRNA and protein expression, in rats with PH.                                                                                 | [21,23]    |
|                          | Pyruvate dehydrogenase (PD) | Pulmonary artery  | Human    | PAH                   | -Increased levels of PDK (inhibitor of PD)                                                                                                      | [24]       |
|                          | VDAC & Citrate synthase     | PASMCs            | Human    | PAH                   | -Lower expression of both VDAC and citrate synthase                                                                                             | [48,49]    |
|                          | PPAR $\gamma$               | PASMCs            | Human    | Chronic hypoxia       | - Hypoxia leads to decrease expression of PPAR $\gamma$                                                                                         | [50]       |
|                          |                             | N/A               | Rat      | Sugen-hypoxia         | - PPAR $\gamma$ agonist decreased RVSP and prevented RV dilation                                                                                | [51]       |
|                          | DRP1                        | PASMCs            | Human    | PAH                   | -DRP-1 key for cell-cycle checkpoint. Overexpression can lead to hyperproliferation.                                                            | [60,61]    |
|                          |                             | Fibroblasts       | Rat      | Monocrotaline         | -RV fibroblasts had increased expression of DRP1. Inhibition of DRP1 led to decreased proliferation.                                            | [62]       |

|                       |                               |                          |               |                                   |                                                                                                                            |           |
|-----------------------|-------------------------------|--------------------------|---------------|-----------------------------------|----------------------------------------------------------------------------------------------------------------------------|-----------|
| <b>Fusion</b>         | Mitofusin 2 (MFN2)            | PASCMCs                  | Human         | PAH                               | -SMCs had decreased MFN2 and higher incidence of mitochondrial fragmentation.                                              | [70]      |
|                       |                               | PASMC                    | Human Rat     | PAH Monocrotaline & Sugen-hypoxia | -Adenoviral-mitofusin 2 overexpression led to decreases of PVR, PA medial thickness and increased lung vascularity.        | [70]      |
| <b>Mitophagy</b>      | UCP2                          | N/A                      | Mouse         | Chronic hypoxia                   | -UCP2 knockout (increased mitophagy) mice develop worse hypoxic PH                                                         | [95]      |
| <b>ROS production</b> | N/A                           |                          |               | Chronic hypoxia                   | -Increased mitochondrial production of superoxide                                                                          | [107-109] |
|                       | Complex I-III                 | PA endothelial and SMCs. | Mouse and rat |                                   | - Lower CI-III activity associated with increased ROS production.                                                          | [110]     |
|                       |                               | PASMCs                   | Rat           | Monocrotaline                     |                                                                                                                            |           |
|                       | NFU1                          |                          |               |                                   | -Rats with G208C mutation had increased RV pressure, RVH and pulmonary artery remodeling.                                  | [111-113] |
|                       |                               | N/A                      | Rat           | N/A                               |                                                                                                                            |           |
|                       | Superoxide dismutase 2 (SOD2) | PASMCs                   | Human         | PAH                               | -Decreased expression of ETC components and SOD2 resulting in lower ROS production and normoxic activation of HIF $\alpha$ | [115]     |
|                       | Superoxide dismutase 3 (SOD3) | N/A                      | Mouse         | Chronic hypoxia                   | -SOD3 whole-body knockout, SMC SOD3 deletion and SNP have been associated with worse hypoxic PH.                           | [120-122] |
